# Supplementary material for: Juvenile hormone regulation of female reproduction in the common bed bug, Cimex lectularius
Source: PubMed Central journal article supplement (PMC5071884; doi:10.1038/srep35546), 2016-10-20
Supplement: srep35546-s1.pdf [file srep35546-s1.pdf]

**Juvenile hormone regulation of female reproduction in the common bed bug, *Cimex lectularius***

**Hemant Gujar and Subba Reddy Palli**

Figure 1S

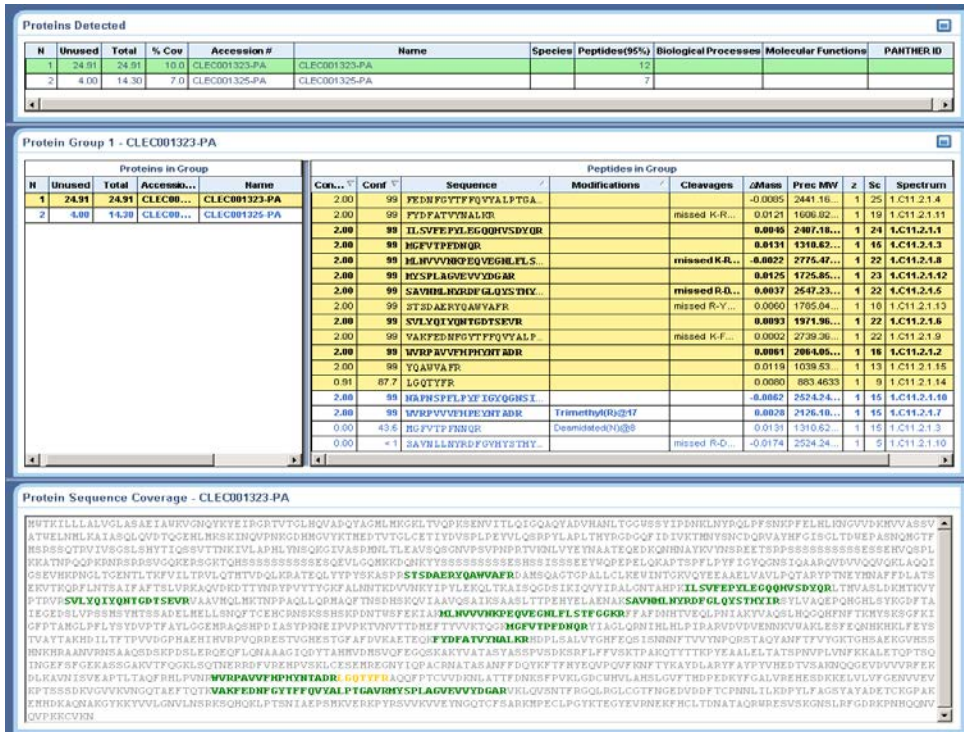

(a)

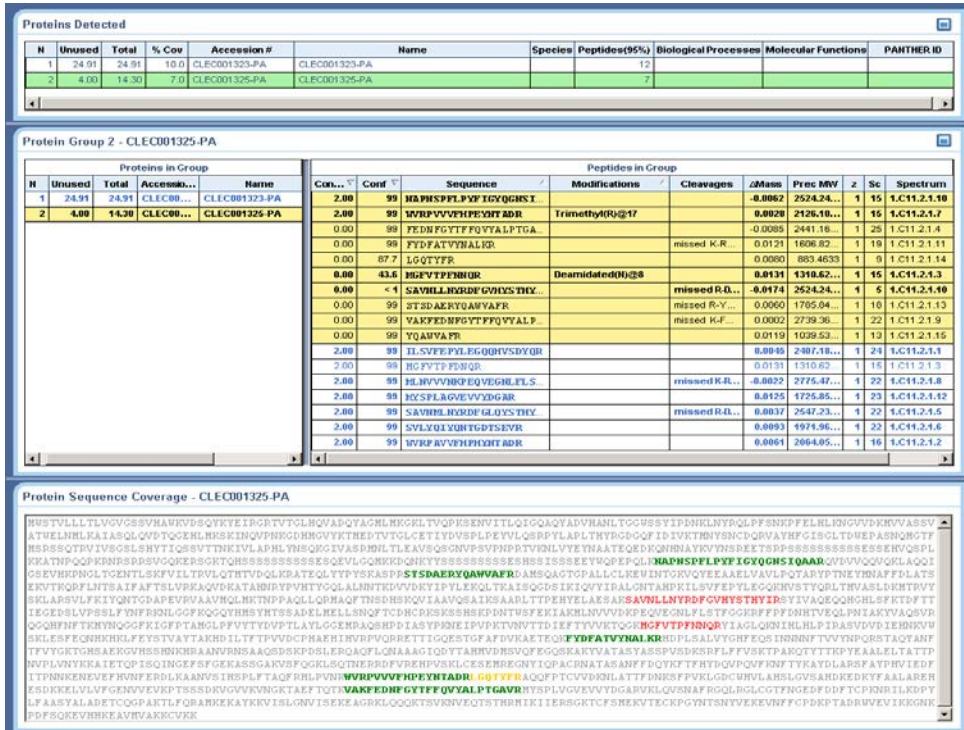

(b)

Fig. S1: Identification of vitellogenin protein by MALDI TOF/TOF. Peptides sequenced matched with CLEC001323 (Vg2) and CLEC001325 (Vg3) proteins.

**Supplementary Table 1: List of primers used in this study**

| dsRNA primers | Forward primer                | Reverse primer            |
|---------------|-------------------------------|---------------------------|
| Vg1           | CTACGGACAAGACGAAGAATTT        | CTTACTGGTGTACAGGTTGTTT    |
| Vg2           | GTTCTCGGAAACGTCCTTAACA        | CGCATTCTTGGGTACTTGAAC     |
| Vg3           | CCATGAAAGAGAAAGCTTACAA        | CTGGGAGAAGTCTGGTTTATTT    |
| Phantom       | ACATCACACTGACTGAACTGGCG       | GAAACGTCGCTGCTCCTTCCATTT  |
| Shade         | CCTTGGAAGCTCAACTCGTCCT        | TGTGCTTTGTCATACTTGGCTGGC  |
| EcR           | TATGTAGACAACAGGGCAAGGCC       | GGAAACGCTTCTGGCACGGATT    |
| USP           | TGAGGAGTTCATTCCAACCCGCAT      | TCTATGGGCATGAAACGTGAGGCT  |
| BR-C          | TGAGGCAAAGGTCTCTTTCGTCGT      | TTCATCGGCATTGCATTGTCCTGG  |
| Met           | CCAAGCTCGACCAGAGAGATAAGA      | AGCTGCTCCGTGCTTGTAT       |
| SRC           | AGCAAAGAGGAGGTCCTAGGGAAA      | CATATTTGCACACTCGCTGCTGCT  |
| Kr-h1         | TTCGGATAACAACCTCCGCTTGGA      | GGTCCACAATCGGAGTCACACA    |
| mTOR          | ATGGCAGGAGAAAGTTACCAGCGA      | AAGAGGCGTACTTAAGCCAGGTGT  |
| InR1          | GTGTTCCCGAACTTGGCCGTTATT      | AAACACAATTGGACGGACCACTGC  |
| InR2          | GCTCCTTATATAACCATCTGAACC      | CTTGGAATCCTTCTCCATAAC     |
| ILP1          | TTCTGACCGCTCACAAACCGATGA      | TCCCTCGCTGCAGTACGATTCAA   |
| ILP2          | CCTATAATTTGAGGATGATCGTATGAATG | CATCCTTGACCATCAGCACAATAGG |
| cTOR          | CAACTGAAGAAGACACTCCTAATA      | GGATCTACTCTTTCTACCACTTTC  |
| GATAa         | AGCAGTCGGTTACAGCATCAGGAA      | TGTACATCGCGGTTGTGTAGTCGT  |
| qRT-PCR       | Forward primer                | Reverse primer            |
| Vg1           | CGTGTGAGCTTTACGCGAGCAAT       | ACCTGTGCGTCGTCATGAAATCGT  |
| Vg2           | TATGTTTCATGAAGACACCGTTT       | GCCTCGACTGAGATGTTGACG     |
| Vg3           | CTCATGTTATTGAAGATTTTATTACCCCT | GAGAATGGATGGAGACATTAGCA   |
| Phantom       | TAATCGGCATTGTAGGGCCTGTCA      | CTTTCAGGTAGCGCAACAAACGGT  |
| Shade         | TCCAAATCGCTTCTTCCCTCACGA      | GCGAACAACAAAGCCCTTGACGAT  |
| EcR           | ATCCTCTTCGCCAATAACCAGCCT      | TGCCTGCAGAACCTAAGTAGACCT  |
| USP           | TGTGTCGACAGAAACGTCACCGAT      | TGTTAAGGTTGCCCTCGCTTAGGT  |
| BR-C          | ATCGCCAAGGGAAGACATGGAAGA      | TGGAGTCTTCCCCTCATTGTGAA   |

|       |                            |                           |
|-------|----------------------------|---------------------------|
| Met   | TCGTCCCTGGTCACAGAAACGAAA   | ACTGCGGTTGATCGCTCTTCGATA  |
| SRC   | ATGAGCTCACTTTCCGTCAAGCCT   | GGTCGCAGATGCTTGCTGTTCTTT  |
| Kr-h1 | ACGCTTTGGCGTACTGAATAACGG   | TTTCGGGATCGCCGATTTCTGTCT  |
| mTOR  | AAGGATGGCTCCCGATTATGAGCA   | CCAAATCATCGCCTTGCGTGTGTT  |
| InR1  | AGACGGCAGATGAGCTTGCTAAGT   | AATGGAGGCTGTTCAAGGGTCTCA  |
| InR2  | GACTGAACTGATAGCTGAAGTAA    | CCTCAATTGAATAGACAACATATCC |
| ILP1  | AACGTGGCTACAACATGGCGTTTC   | ATCCCTCGCTGCAGTACGATTCAA  |
| ILP2  | GTGGCCGGACTTTAACGAAGATGT   | ATCCATTGCAAATGACTCGGAGCG  |
| TOR   | GGACAATGGCCTCAAGTGTATGAAGC | ACCAATCGACCGACAAAGGTACGA  |
| cTOR  | CCACCTATCACCTATCAACATATC   | ATCTAGAAGCTGGGTGTAAATTC   |
| GATAa | ACTAGAGAGCAAAGTCTGGCAGCA   | CCAATGCGTCGGCCATAGTGAAA   |
| HR3   | TTGACCCTGTCAACGAGACAAGC    | ATCACATGCGAGGGTTGCAAGG    |
